# Supplementary material
Source: PubMed Central journal article supplement (PMC7038267)
Supplement: AAC.02003-19-s0001.pdf [file AAC.02003-19-s0001.pdf]

## SUPPLEMENTAL DATA:

| Treatment<br>Time               | saline         |                 |                | S. epidermidis     |                                                                     |                   |
|---------------------------------|----------------|-----------------|----------------|--------------------|---------------------------------------------------------------------|-------------------|
|                                 | 2 hr           | 14 hr           | 48 hr          | 2 hr               | 14 hr                                                               | 48 hr             |
| <b>IL-1<math>\alpha</math></b>  | 57 $\pm$ 23    | 80 $\pm$ 45     | 75 $\pm$ 43    | 398 $\pm$ 182      | 1094 $\pm$ 643***                                                   | 298 $\pm$ 125     |
| <b>IL-1<math>\beta</math></b>   | 844 $\pm$ 210  | 725 $\pm$ 89    | 767 $\pm$ 162  | 1462 $\pm$ 449     | 3115 $\pm$ 1533***                                                  | 1361 $\pm$ 358    |
| <b>IL-2</b>                     | 38 $\pm$ 8     | 36 $\pm$ 8      | 46 $\pm$ 13    | 66 $\pm$ 17*       | 102 $\pm$ 25***                                                     | 59 $\pm$ 18       |
| <b>IL-3</b>                     | 5 $\pm$ 7      | 6 $\pm$ 4       | 14 $\pm$ 11    | 29 $\pm$ 18        | 62 $\pm$ 34**                                                       | 22 $\pm$ 8        |
| <b>IL-4</b>                     | 2 $\pm$ 0      | 2 $\pm$ 0       | 5 $\pm$ 6      | 17 $\pm$ 16        | 58 $\pm$ 38***                                                      | 14 $\pm$ 12       |
| <b>IL-5</b>                     | 54 $\pm$ 32    | 45 $\pm$ 39     | 79 $\pm$ 61    | 304 $\pm$ 113**    | 474 $\pm$ 279***                                                    | 76 $\pm$ 35       |
| <b>IL-6</b>                     | 19 $\pm$ 7     | 16 $\pm$ 4      | 17 $\pm$ 5     | 6978 $\pm$ 4218*** | 2663 $\pm$ 5574                                                     | 160 $\pm$ 90      |
| <b>IL-9</b>                     | 440 $\pm$ 364  | 360 $\pm$ 204   | 650 $\pm$ 385  | 143 $\pm$ 254      | 611 $\pm$ 598                                                       | 552 $\pm$ 526     |
| <b>IL-10</b>                    | 110 $\pm$ 31   | 114 $\pm$ 13    | 170 $\pm$ 53   | 344 $\pm$ 116      | 684 $\pm$ 396***                                                    | 216 $\pm$ 64      |
| <b>IL-12 (p40)</b>              | 419 $\pm$ 93   | 717 $\pm$ 226   | 821 $\pm$ 113  | 481 $\pm$ 88       | 572 $\pm$ 395                                                       | 350 $\pm$ 71***   |
| <b>IL-12 (p70)</b>              | 260 $\pm$ 84   | 230 $\pm$ 87    | 345 $\pm$ 160  | 1238 $\pm$ 471***  | 829 $\pm$ 835                                                       | 347 $\pm$ 122     |
| <b>IL-13</b>                    | 354 $\pm$ 83   | 339 $\pm$ 74    | 369 $\pm$ 113  | 631 $\pm$ 202      | 1404 $\pm$ 439***                                                   | 681 $\pm$ 215     |
| <b>IL-17</b>                    | 189 $\pm$ 63   | 179 $\pm$ 51    | 280 $\pm$ 114  | 516 $\pm$ 218***   | 227 $\pm$ 148                                                       | 229 $\pm$ 84      |
| <b>Eotaxin</b>                  | 1923 $\pm$ 384 | 1870 $\pm$ 1340 | 1971 $\pm$ 483 | 3522 $\pm$ 1343*   | 5943 $\pm$ 1655***                                                  | 2784 $\pm$ 563    |
| <b>G-CSF</b>                    | 78 $\pm$ 31    | 66 $\pm$ 23     | 73 $\pm$ 20    | 12668 $\pm$ 9805   | 4.4 $\times$ 10 <sup>5</sup> $\pm$ 3.6 $\times$ 10 <sup>5</sup> *** | 41639 $\pm$ 32833 |
| <b>GM-CSF</b>                   | 438 $\pm$ 86   | 459 $\pm$ 63    | 413 $\pm$ 79   | 649 $\pm$ 110*     | 1007 $\pm$ 206***                                                   | 499 $\pm$ 94      |
| <b>IFN-g</b>                    | 44 $\pm$ 18    | 37 $\pm$ 7      | 51 $\pm$ 19    | 80 $\pm$ 29        | 196 $\pm$ 64***                                                     | 83 $\pm$ 22       |
| <b>KC</b>                       | 113 $\pm$ 24   | 147 $\pm$ 24    | 123 $\pm$ 16   | 24049 $\pm$ 11582  | 26874 $\pm$ 50067                                                   | 395 $\pm$ 269     |
| <b>MCP-1</b>                    | 709 $\pm$ 245  | 647 $\pm$ 120   | 774 $\pm$ 340  | 15237 $\pm$ 10276  | 35134 $\pm$ 73021                                                   | 1732 $\pm$ 500    |
| <b>MIP-1<math>\alpha</math></b> | 19 $\pm$ 14    | 13 $\pm$ 8      | 21 $\pm$ 11    | 263 $\pm$ 169      | 1317 $\pm$ 2354                                                     | 77 $\pm$ 48       |
| <b>MIP-1<math>\beta</math></b>  | 86 $\pm$ 35    | 59 $\pm$ 18     | 97 $\pm$ 34    | 424 $\pm$ 171      | 2480 $\pm$ 4374                                                     | 203 $\pm$ 181     |
| <b>RANTES</b>                   | 25 $\pm$ 7     | 28 $\pm$ 9      | 32 $\pm$ 6     | 61 $\pm$ 15        | 152 $\pm$ 179*                                                      | 29 $\pm$ 7        |
| <b>TNF-<math>\alpha</math></b>  | 539 $\pm$ 140  | 448 $\pm$ 160   | 773 $\pm$ 307  | 622 $\pm$ 186      | 1505 $\pm$ 825***                                                   | 959 $\pm$ 335     |

**Table S1. Serum cytokine profile after injection of saline or bacteria.** Postnatal day 4 mice were intraperitoneally injected with saline or 3.5 $\times$ 10<sup>7</sup> CFU of *S. epidermidis*. Selected data is plotted in Figure 1B. Data shows mean concentration of cytokines (pg/mL)  $\pm$  SD (\*P < 0.05, \*\*P < 0.01, \*\*\*P < 0.001). Two-way ANOVA with Bonferroni post hoc test comparing between saline (n = 6) and *S. epidermidis* treated groups (n = 8) over time.

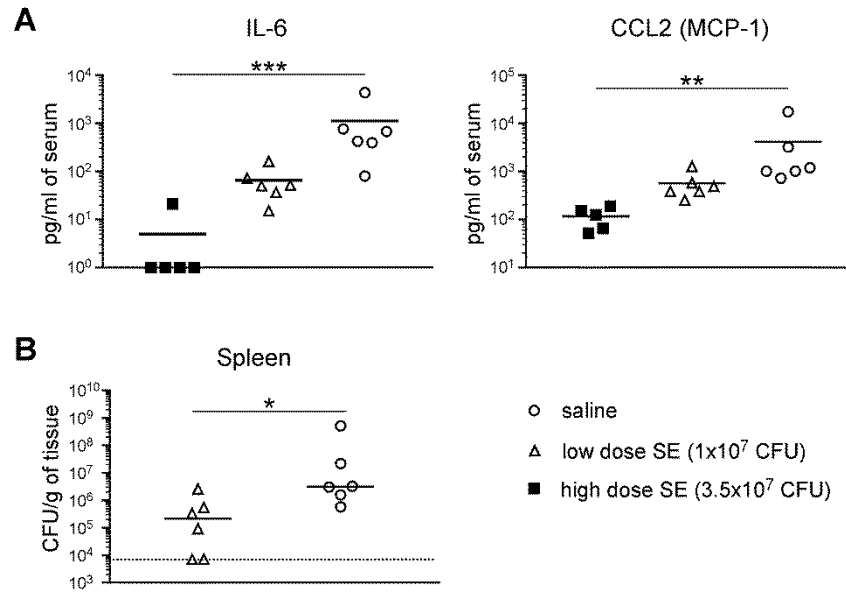

**Figure S1: Serum cytokine production upon *S. epidermidis* infection is inoculum dose dependent.** Mice injected intraperitoneally with saline,  $1 \times 10^7$  or  $3.5 \times 10^7$  CFU *S. epidermidis* (SE) at PND4 were sacrificed for peripheral blood cytokine analysis at 14 hours after infection. **(A)** IL-6 and MCP-1 ELISA of serum samples. Statistical analysis employed Kruskal-Wallis test with Bonferroni post hoc test (\*\* $P < 0.01$ ; \*\*\* $P < 0.001$ ). **(B)** Bacterial cell counts in the spleen. Solid line depicts the median. Dotted line represents detection threshold. Statistical analysis employed Mann-Whitney U test (\* $P < 0.05$ ). Data shown are pooled from two independent experiments.

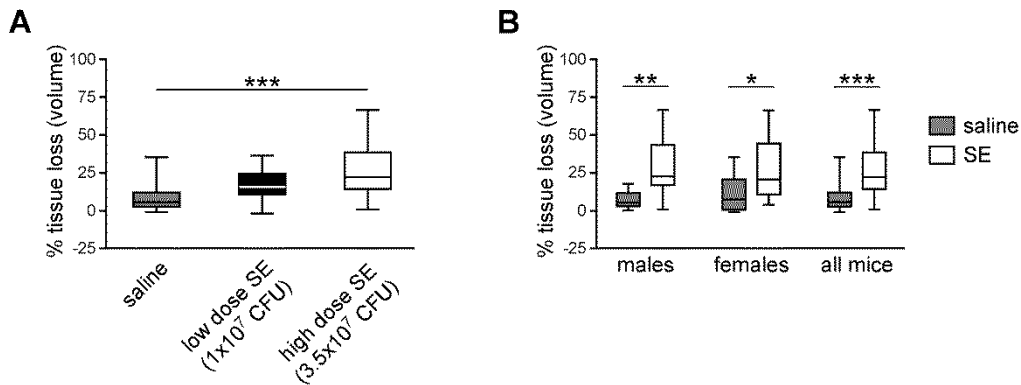

**Figure S2: Bacterial infection potentiation of hypoxia-ischemia brain injury is unaffected by the sex of the animals, but is dependent on the bacterial inoculum dose.** Hypoxia-ischemia was induced 14 hours after injection with saline or *S. epidermidis* (SE) into PND4 mice. Brains were harvested 9 days later (PND14), stained for microtubule-associated protein 2 (MAP-2) and analyzed for gray matter tissue loss. Box and whiskers plot with the box extending from the 25<sup>th</sup> to 75<sup>th</sup> percentiles and the median (line) is depicted. Whiskers indicates the minimum and maximum. **(A)** Area of gray matter tissue loss in the ipsilateral cerebral hemisphere of mice injected with high and low inoculum dose of bacteria (n = 23 saline; 12 low dose SE, 1.7×10<sup>7</sup> CFU; 23 high dose SE, 3.5×10<sup>7</sup> CFU). Statistical analysis employed the Kruskal-Wallis test with Dunn’s Multiple Comparison *post hoc* test (\*\*P < 0.01, \*\*\*P < 0.001). **(B)** Area of gray matter tissue loss in the ipsilateral cerebral hemisphere comparing between male (n = 11 saline; 10 SE) and female mice (n = 12 saline; 13 SE, 3.5×10<sup>7</sup> CFU). Statistical analysis comparing mice in saline versus SE treatment groups employed the Mann-Whitney U test (\*P < 0.05, \*\*P < 0.01, \*\*\*P < 0.001). Two-way ANOVA comparing between male and female mice in the two treatment groups showed no statistical significance.
